# Supplementary material for: Theoretical investigation of structural and electronic propertyies of [PW12O40]3− on graphene layer
Source: Royal Society of Chemistry journal article supplement (doi:10.1039/c2dt12465c), 2012-01-01
Supplement: c2dt12465c.pdf [file c2dt12465c.pdf]

## Supporting Information

# Theoretical investigation of structural and electronic property of $[\text{PW}_{12}\text{O}_{40}]^{3-}$ on graphene layer

Shizheng Wen, Wei Guan, Jianping Wang, Zhongling Lang, Likai Yan, and Zhongmin Su

Institute of Functional Material Chemistry, Faculty of Chemistry, Northeast Normal University,  
Changchun 130024, P. R. China, Fax: +86-431-85684009; Tel: +86-431-85099108; E-mail:  
zmsu@nenu.edu.cn

### Content

1. Table S1. The adsorption energy ( $E_a$ ) calculated with GGA and vdW-DF method.
2. Figure S1. The final geometries of  $\text{Na}_3\text{-PW}_{12}$  (S4-B-Na3) deposited on graphene layer selected in the calculation (tungsten in green, oxygen in red, phosphorus in yellow and sodium in purple). (a) and (b) with views along  $-z$  and  $y$  axes directions, respectively.
3. Figure S2. The Projected Density of State (PDOS) of Group 1 (S4-B, S4-H, and S4-T).
4. Figure S3. The Projected Density of State (PDOS) of Group 2 (C3-B, C3-H, and C3-T).
5. Optimized Cartesian coordinates of  $\text{PW}_{12}$  using LDA and GGA
6. Optimized Cartesian coordinates of  $\text{G-PW}_{12}$  complex using GGA (shows with following sequence: S4-B, S4-H, S4-T, C3-B, C3-H, and C3-T)

Due to the charged property of treated system, the charge spurious interactions induced by the periodic boundary conditions may be a trick one. To take full account of this effect, we also checked one of the neutral complexes based on S4-B model which was added three Na cations as counterions to keep electrical neutral of the system (S4-B-Na<sub>3</sub>). The three Na ions were positioned around the PW<sub>12</sub> which is farthest to the graphene surface (Figure S1). As there is some uncertainty in determining the position of the Na cations. We just took one of the possible situations which the Na cations were supposed to interact only with the bridging oxygens. Full optimization with the same force convergence was also used for this model. (Due to the same fixed supercell, atoms and charge of our adopted models, we just take this lowest energy configuration as an example for convenient.) The adsorption energy of S4-B-Na<sub>3</sub> is -1.76 eV under GGA method which is also confirmed the correction of dipole correction interaction in our model is suitable.

We used the van der Waals density functional (vdW-DF) as proposed by Dion *et al.* [Phys. Rev. Lett. **92**, 246401 (2004)] and recently implemented in the SIESTA code [Phys. Rev. Lett. **103**, 096102 (2009)] to check the adsorption energy ( $E_a$ ). The vdW-DF is a promising approach for including dispersion in approximate density functional theory exchange-correlation functional. The results of  $E_a$  with both GGA and vdW-DF are summarized in Table S1. Here we chose the Group II (S4 series) as an example. It is noted that the implement of calculation van der Waals Force is ineffective at present state. So the structures adopted here are not optimized with vdW-DF, and instead we use the optimized geometries with GGA method. From the results in Table S1, the largest error of  $E_a$  between GGA and vdW-DF is within 30 meV.

Table S1. The adsorption energy ( $E_a$ ) calculated with GGA and vdW-DF method.

|      | GGA (eV) | vdW-DF (eV) |
|------|----------|-------------|
| S4-B | -1.786   | -1.767      |
| S4-T | -1.744   | -1.739      |
| S4-H | -1.693   | -1.663      |

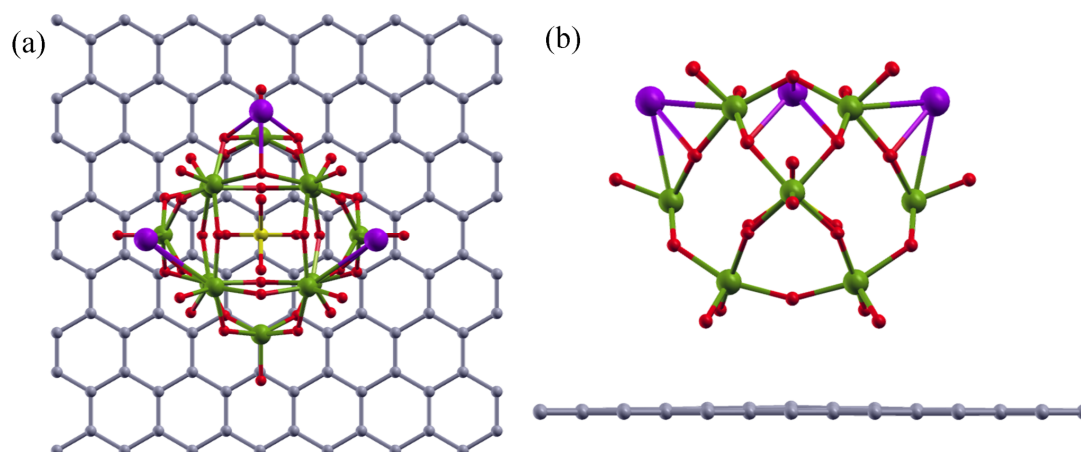

**Figure S1.** The final geometries of  $\text{Na}_3\text{-PW}_{12}$  (S4-B-Na3) deposited on graphene layer selected in the calculation (tungsten in green, oxygen in red, phosphorus in yellow and sodium in purple). (a) and (b) with views along  $-z$  and  $y$  axes directions, respectively.

The DOS is an important way to understand the adsorbate effects on the electronic properties of the interfacial systems. From Figure S2 and S3, in each group the overall TDOS have very similar population. As shown in the text, the energy barrier between each other in the same group is low which means the coexistence of conformation. As discussed above, the POM is physisorption on the graphene layer. It may be more easily separated after catalytic process. It is believed to behavior different from the graphene oxide-POM systems [Li, *et al.* Chem. Commun., 46, 6243 (2010)].

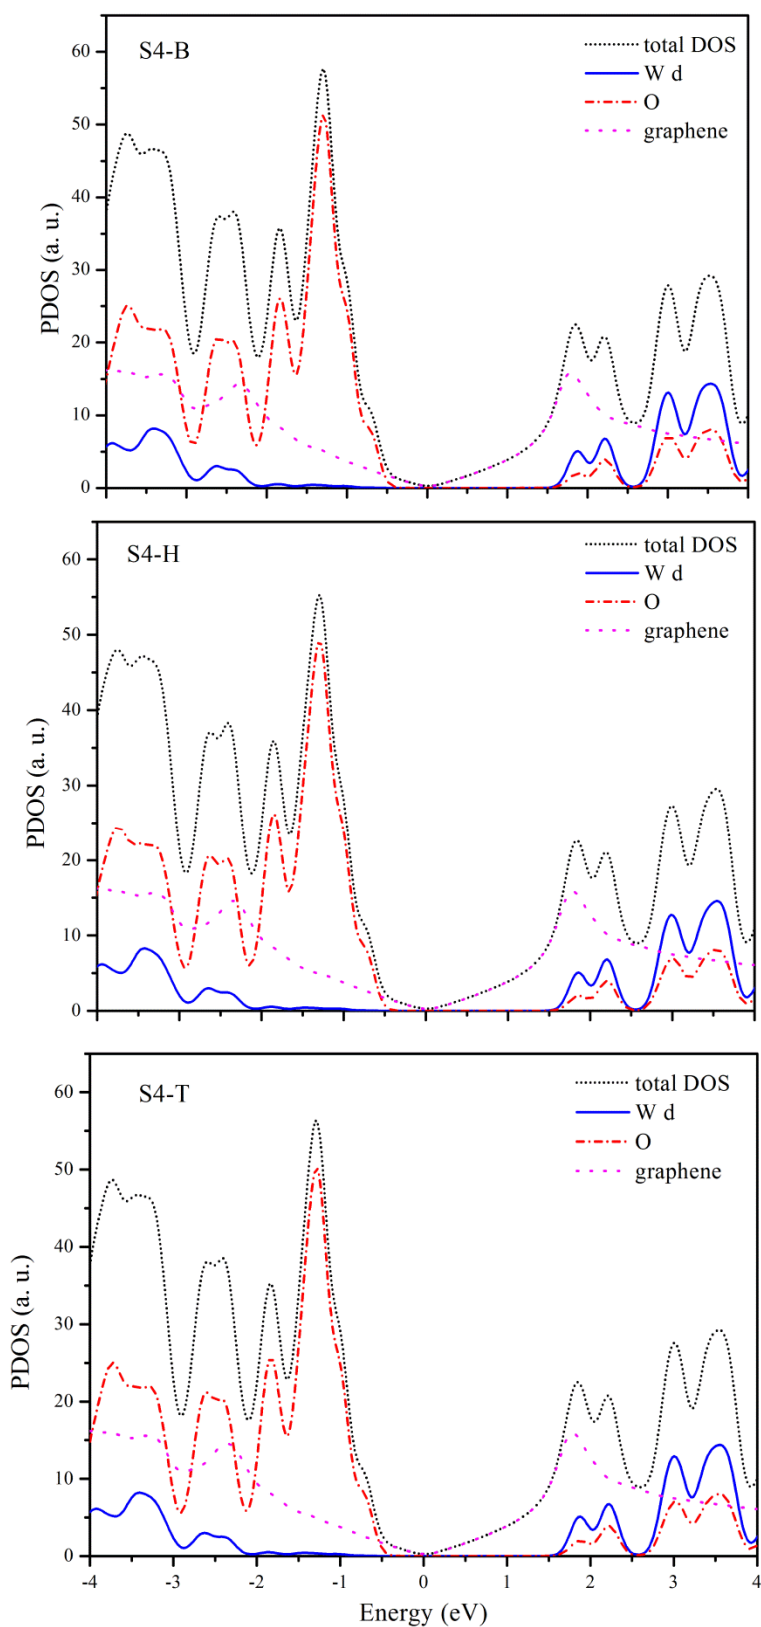

**Figure S2.** The total and Projected Density of State (TDOS, PDOS) of Group 1 (S4-B, S4-H, and S4-T).

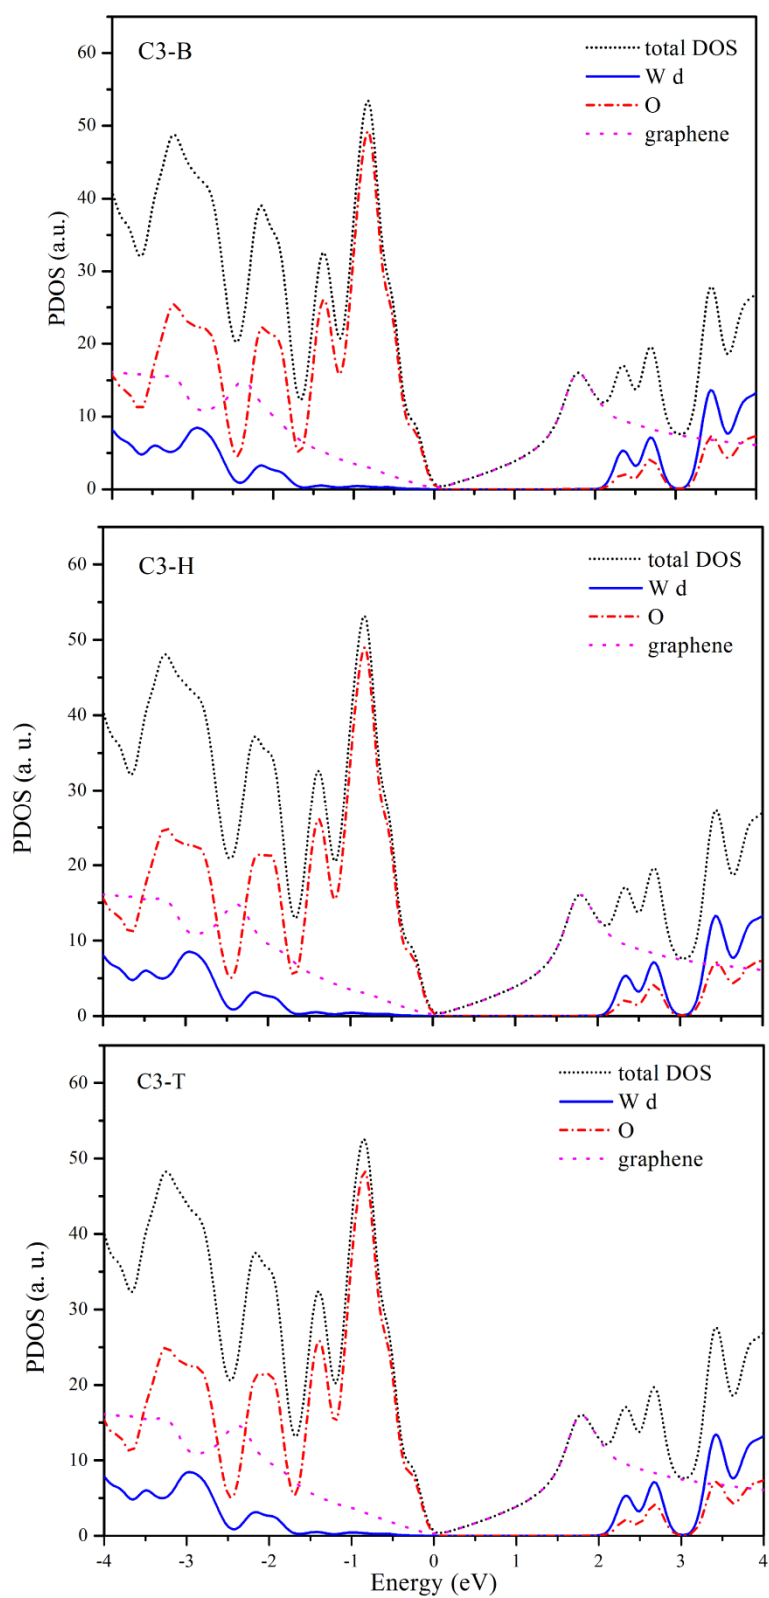

**Figure S3.** The Projected Density of State (PDOS) of Group 2 (C3-B, C3-H, and C3-T).

Here and followed, the detail Cartesian coordinates of structures discussed in the main text is shown.

**Optimized Cartesian coordinates of PW<sub>12</sub> using LDA (Cell side 30x30x30 Å)**

|   |           |           |           |
|---|-----------|-----------|-----------|
| P | -0.000002 | 0.000638  | 0.001408  |
| W | -1.686263 | -0.974587 | 2.936952  |
| W | 1.686922  | -3.092721 | -0.059936 |
| W | 1.835008  | 1.058734  | -2.811270 |
| W | -1.835153 | 3.008088  | -0.058980 |
| W | 1.686267  | -0.974580 | 2.936953  |
| W | 1.835148  | 3.008090  | -0.058980 |
| W | -1.835008 | 1.058737  | -2.811270 |
| W | -1.686923 | -3.092726 | -0.059939 |
| W | -0.000004 | -2.119169 | -2.813089 |
| W | -3.522116 | 0.085972  | -0.058097 |
| W | -0.000002 | 1.948028  | 2.937210  |
| W | 3.522121  | 0.085980  | -0.058102 |
| O | 0.000004  | 0.000111  | 1.563446  |
| O | -0.000012 | -1.472181 | -0.519408 |
| O | 1.276164  | 0.737133  | -0.519023 |
| O | -1.276165 | 0.737139  | -0.519018 |
| O | -2.834630 | -1.636381 | -0.402520 |
| O | 2.832577  | -0.164540 | 1.678656  |
| O | -1.275101 | -0.737265 | -2.947562 |
| O | 1.274682  | 2.536668  | 1.677980  |
| O | 2.834626  | -1.636375 | -0.402516 |
| O | -1.274682 | 2.536665  | 1.677976  |
| O | 1.275097  | -0.737267 | -2.947560 |
| O | -2.832572 | -0.164542 | 1.678654  |
| O | -0.000001 | 1.470825  | -2.947876 |
| O | -1.559291 | -2.372127 | 1.678466  |
| O | -0.000002 | 3.272504  | -0.402996 |
| O | 1.559290  | -2.372125 | 1.678471  |
| O | 1.297105  | 0.749142  | 3.623659  |
| O | -1.297561 | -3.167826 | -1.912675 |
| O | 3.391475  | 1.958817  | 0.205364  |
| O | -3.391584 | 0.459508  | -1.910618 |
| O | -1.297105 | 0.749137  | 3.623653  |
| O | 3.391586  | 0.459508  | -1.910620 |
| O | -3.391477 | 1.958815  | 0.205363  |
| O | 1.297558  | -3.167818 | -1.912670 |
| O | 0.000000  | -3.915146 | 0.205377  |
| O | -2.094536 | 2.706647  | -1.912092 |
| O | 0.000003  | -1.498773 | 3.624954  |
| O | 2.094535  | 2.706643  | -1.912090 |
| O | -2.748682 | -1.587694 | 4.089222  |
| O | 2.747888  | -4.384711 | 0.133357  |
| O | 2.423956  | 1.398397  | -4.350691 |
| O | -2.421977 | 4.573771  | 0.133711  |
| O | 2.748685  | -1.587693 | 4.089223  |
| O | 2.421976  | 4.573771  | 0.133710  |
| O | -2.423956 | 1.398399  | -4.350693 |

|   |           |           |           |
|---|-----------|-----------|-----------|
| O | -2.747891 | -4.384715 | 0.133358  |
| O | 0.000000  | -2.799181 | -4.352838 |
| O | -5.171728 | -0.187102 | 0.134345  |
| O | -0.000017 | 3.174153  | 4.090613  |
| O | 5.171719  | -0.187102 | 0.134346  |

**Optimized Cartesian coordinates of PW<sub>12</sub> using GGA (Cell side 30x30x30 Å)**

|   |           |           |           |
|---|-----------|-----------|-----------|
| P | 0.000010  | -0.000500 | 0.000112  |
| W | -1.742138 | -1.005571 | 3.018486  |
| W | 1.741414  | -3.180101 | -0.057512 |
| W | 1.884207  | 1.083352  | -2.898358 |
| W | -1.883410 | 3.095425  | -0.055043 |
| W | 1.742137  | -1.005573 | 3.018493  |
| W | 1.883395  | 3.095418  | -0.055032 |
| W | -1.884210 | 1.083343  | -2.898366 |
| W | -1.741403 | -3.180104 | -0.057512 |
| W | 0.000008  | -2.176971 | -2.903875 |
| W | -3.627575 | 0.080540  | -0.054060 |
| W | -0.000014 | 2.009451  | 3.019147  |
| W | 3.627568  | 0.080547  | -0.054054 |
| O | 0.000081  | 0.000193  | 1.581518  |
| O | 0.000004  | -1.490603 | -0.528866 |
| O | 1.292951  | 0.743848  | -0.526107 |
| O | -1.292948 | 0.743835  | -0.526099 |
| O | -2.967322 | -1.713085 | -0.398847 |
| O | 2.964838  | -0.188232 | 1.750074  |
| O | -1.317732 | -0.765479 | -3.089833 |
| O | 1.316623  | 2.657213  | 1.748032  |
| O | 2.967329  | -1.713082 | -0.398846 |
| O | -1.316643 | 2.657213  | 1.748023  |
| O | 1.317717  | -0.765566 | -3.089856 |
| O | -2.964847 | -0.188233 | 1.750066  |
| O | -0.000002 | 1.513990  | -3.086321 |
| O | -1.643253 | -2.466302 | 1.746344  |
| O | -0.000012 | 3.417525  | -0.400241 |
| O | 1.643254  | -2.466288 | 1.746355  |
| O | 1.342222  | 0.774899  | 3.716018  |
| O | -1.340346 | -3.246506 | -1.966759 |
| O | 3.482437  | 2.008543  | 0.223739  |
| O | -3.482266 | 0.458199  | -1.965292 |
| O | -1.342255 | 0.774887  | 3.716036  |
| O | 3.482261  | 0.458208  | -1.965284 |
| O | -3.482446 | 2.008531  | 0.223739  |
| O | 1.340361  | -3.246508 | -1.966755 |
| O | 0.000007  | -4.016739 | 0.227358  |
| O | -2.138696 | 2.779754  | -1.965839 |
| O | 0.000000  | -1.546277 | 3.715656  |
| O | 2.138681  | 2.779759  | -1.965829 |

|   |           |           |           |
|---|-----------|-----------|-----------|
| O | -2.808158 | -1.623896 | 4.230649  |
| O | 2.804804  | -4.530510 | 0.122707  |
| O | 2.519416  | 1.450840  | -4.463173 |
| O | -2.517476 | 4.693055  | 0.122707  |
| O | 2.808145  | -1.623905 | 4.230680  |
| O | 2.517462  | 4.693053  | 0.122708  |
| O | -2.519416 | 1.450836  | -4.463176 |
| O | -2.804791 | -4.530502 | 0.122703  |
| O | 0.000018  | -2.910316 | -4.469427 |
| O | -5.328955 | -0.166101 | 0.124464  |
| O | -0.000017 | 3.244627  | 4.228373  |
| O | 5.328951  | -0.166097 | 0.124469  |

The orthogonal cell is  $17.33 \times 17.15 \times 30.0$  Å (for GGA) with 112 carbon atoms plus 53 atoms of PW<sub>12</sub>.

### Optimized Cartesian coordinates of S4-B using GGA

|   |           |           |          |
|---|-----------|-----------|----------|
| C | -0.005502 | -0.310838 | 9.693903 |
| C | -0.005154 | 2.548217  | 9.725435 |
| C | -0.004843 | 3.977817  | 9.750376 |
| C | -0.004876 | 6.834886  | 9.786495 |
| C | -0.004926 | 8.264389  | 9.785807 |
| C | -0.004848 | 11.121528 | 9.747510 |
| C | 1.232744  | 0.404216  | 9.704587 |
| C | 1.233496  | 1.833991  | 9.720912 |
| C | 1.233445  | 4.692162  | 9.773655 |
| C | 1.233914  | 6.121441  | 9.795428 |
| C | 1.233726  | 8.978274  | 9.793666 |
| C | 1.233652  | 10.407608 | 9.770586 |
| C | 2.470823  | -0.310695 | 9.707347 |
| C | 2.471318  | 2.548627  | 9.740917 |
| C | 2.472605  | 3.978317  | 9.770287 |
| C | 2.472338  | 6.834978  | 9.822884 |
| C | 2.472244  | 8.264574  | 9.821884 |
| C | 2.472732  | 11.121173 | 9.765868 |
| C | 3.708299  | 0.404927  | 9.719546 |
| C | 3.709009  | 1.834546  | 9.736731 |
| C | 3.709025  | 4.691854  | 9.799532 |
| C | 3.709653  | 6.120586  | 9.837717 |
| C | 3.709682  | 8.979038  | 9.835230 |
| C | 3.709120  | 10.407746 | 9.795108 |
| C | 4.945764  | -0.310822 | 9.720601 |
| C | 4.945906  | 2.550612  | 9.757623 |
| C | 4.946655  | 3.977600  | 9.789167 |
| C | 4.945976  | 6.835185  | 9.869747 |
| C | 4.946009  | 8.264384  | 9.868430 |
| C | 4.946635  | 11.121864 | 9.782854 |
| C | 6.183153  | 0.405222  | 9.729610 |
| C | 6.183332  | 1.834742  | 9.750172 |
| C | 6.183720  | 4.692689  | 9.827179 |
| C | 6.183391  | 6.120849  | 9.875969 |
| C | 6.183610  | 8.978888  | 9.873045 |



|   |           |           |          |
|---|-----------|-----------|----------|
| C | 6.183542  | 10.406895 | 9.822113 |
| C | 7.420442  | -0.310656 | 9.725127 |
| C | 7.420431  | 2.549382  | 9.768773 |
| C | 7.420542  | 3.979236  | 9.812027 |
| C | 7.420622  | 6.835044  | 9.910280 |
| C | 7.420685  | 8.264478  | 9.909275 |
| C | 7.420513  | 11.120177 | 9.807469 |
| C | 8.657867  | 0.405235  | 9.727232 |
| C | 8.657622  | 1.834751  | 9.746784 |
| C | 8.657493  | 4.692733  | 9.822410 |
| C | 8.657802  | 6.120848  | 9.871377 |
| C | 8.657754  | 8.978805  | 9.870076 |
| C | 8.657595  | 10.406983 | 9.820151 |
| C | 9.895242  | -0.310865 | 9.716938 |
| C | 9.895287  | 2.550581  | 9.750864 |
| C | 9.894318  | 3.977581  | 9.780053 |
| C | 9.895387  | 6.834999  | 9.860677 |
| C | 9.895213  | 8.264351  | 9.860029 |
| C | 9.894536  | 11.121790 | 9.778037 |
| C | 11.132805 | 0.404849  | 9.714229 |
| C | 11.132306 | 1.834522  | 9.729690 |
| C | 11.132142 | 4.691893  | 9.788638 |
| C | 11.131672 | 6.120548  | 9.826393 |
| C | 11.131487 | 8.978915  | 9.824792 |
| C | 11.132045 | 10.407552 | 9.786636 |
| C | 12.370363 | -0.310727 | 9.702061 |
| C | 12.369962 | 2.548634  | 9.732908 |
| C | 12.368416 | 3.978288  | 9.760925 |
| C | 12.368886 | 6.834909  | 9.812288 |
| C | 12.368875 | 8.264388  | 9.811323 |
| C | 12.368397 | 11.120930 | 9.759138 |
| C | 13.608384 | 0.404180  | 9.699313 |
| C | 13.607727 | 1.833920  | 9.714823 |
| C | 13.607494 | 4.692088  | 9.765979 |
| C | 13.607175 | 6.121353  | 9.787387 |
| C | 13.607286 | 8.978084  | 9.786108 |
| C | 13.607397 | 10.407355 | 9.764224 |
| C | 14.846562 | -0.310889 | 9.691000 |
| C | 14.846087 | 2.548173  | 9.721767 |
| C | 14.845841 | 3.977713  | 9.746363 |
| C | 14.845689 | 6.834829  | 9.782197 |
| C | 14.845843 | 8.264311  | 9.781601 |
| C | 14.845678 | 11.121326 | 9.744675 |
| C | 16.084834 | 0.404133  | 9.694476 |
| C | 16.084661 | 1.833956  | 9.710366 |
| C | 16.084601 | 4.691863  | 9.757093 |
| C | 16.084650 | 6.121272  | 9.774825 |
| C | 16.084692 | 8.978312  | 9.773632 |
| C | 16.084514 | 10.407748 | 9.755054 |
| C | -0.005190 | 12.551191 | 9.722561 |
| C | -0.005431 | 15.410005 | 9.693058 |
| C | 1.233287  | 13.265704 | 9.717816 |

|   |           |           |           |
|---|-----------|-----------|-----------|
| C | 1.232960  | 14.695481 | 9.702922  |
| C | 2.471245  | 12.550792 | 9.736489  |
| C | 2.470794  | 15.410116 | 9.706426  |
| C | 3.709003  | 13.265052 | 9.732731  |
| C | 3.708350  | 14.694624 | 9.717554  |
| C | 4.946089  | 12.548858 | 9.752610  |
| C | 4.945762  | 15.410222 | 9.719583  |
| C | 6.183589  | 13.264925 | 9.746222  |
| C | 6.183121  | 14.694333 | 9.727869  |
| C | 7.420650  | 12.549999 | 9.764560  |
| C | 7.420451  | 15.410069 | 9.724591  |
| C | 8.657693  | 13.264997 | 9.744732  |
| C | 8.657958  | 14.694422 | 9.726531  |
| C | 9.895252  | 12.548811 | 9.749016  |
| C | 9.895512  | 15.410157 | 9.716730  |
| C | 11.132363 | 13.264993 | 9.728904  |
| C | 11.132962 | 14.694611 | 9.714016  |
| C | 12.370002 | 12.550629 | 9.731815  |
| C | 12.370487 | 15.410131 | 9.702144  |
| C | 13.607834 | 13.265514 | 9.714193  |
| C | 13.608327 | 14.695279 | 9.699363  |
| C | 14.846271 | 12.551107 | 9.720455  |
| C | 14.846425 | 15.410084 | 9.690779  |
| C | 16.084710 | 13.265607 | 9.708429  |
| C | 16.084598 | 14.695514 | 9.693266  |
| P | 7.458590  | 7.552856  | 16.150595 |
| W | 7.457438  | 3.927229  | 16.271662 |
| W | 11.085492 | 7.545035  | 16.053185 |
| W | 7.462143  | 11.180758 | 16.269203 |
| W | 3.834133  | 7.557166  | 16.068226 |
| W | 9.206713  | 5.670861  | 18.724565 |
| W | 5.722835  | 9.435784  | 18.728499 |
| W | 5.574323  | 9.303698  | 13.601037 |
| W | 9.332003  | 5.801844  | 13.592215 |
| W | 9.338085  | 9.298779  | 13.597157 |
| W | 5.569791  | 5.807019  | 13.601026 |
| W | 5.715925  | 5.671762  | 18.726998 |
| W | 9.211348  | 9.431939  | 18.719367 |
| O | 7.459221  | 6.263712  | 17.062362 |
| O | 8.741072  | 7.553012  | 15.224808 |
| O | 7.462381  | 8.839866  | 17.064592 |
| O | 6.172190  | 7.556605  | 15.229725 |
| O | 7.452819  | 5.878981  | 13.069831 |
| O | 9.100851  | 7.551114  | 19.193542 |
| O | 7.456130  | 9.223042  | 13.074182 |
| O | 5.822670  | 7.553615  | 19.192851 |
| O | 10.426265 | 8.859769  | 17.325504 |
| O | 4.495475  | 6.238872  | 17.331392 |
| O | 8.768412  | 10.511201 | 14.982955 |
| O | 6.147477  | 4.602691  | 14.987887 |
| O | 6.152270  | 10.514245 | 14.984990 |
| O | 8.761897  | 4.597736  | 14.982803 |

|   |           |           |           |
|---|-----------|-----------|-----------|
| O | 4.502828  | 8.868935  | 17.332318 |
| O | 10.424284 | 6.235511  | 17.327388 |
| O | 7.461371  | 5.406988  | 19.560786 |
| O | 9.584421  | 7.550162  | 12.732017 |
| O | 7.466738  | 9.695226  | 19.562553 |
| O | 5.327945  | 7.555924  | 12.735837 |
| O | 6.112156  | 4.074972  | 17.669489 |
| O | 8.810622  | 11.028120 | 17.664671 |
| O | 3.983760  | 6.222156  | 14.647518 |
| O | 10.927885 | 8.887030  | 14.642315 |
| O | 10.924263 | 6.212523  | 14.639691 |
| O | 3.988189  | 8.893570  | 14.649574 |
| O | 8.804379  | 4.073711  | 17.666745 |
| O | 6.118768  | 11.030233 | 17.667991 |
| O | 7.456247  | 2.234625  | 15.960692 |
| O | 12.781261 | 7.542832  | 16.349315 |
| O | 7.463089  | 12.873879 | 15.961985 |
| O | 2.140982  | 7.561405  | 16.378191 |
| O | 10.265134 | 5.038875  | 19.934276 |
| O | 4.664834  | 10.064997 | 19.939730 |
| O | 4.905366  | 10.366418 | 12.404625 |
| O | 9.996884  | 4.734178  | 12.397829 |
| O | 10.004541 | 10.359841 | 12.398816 |
| O | 4.895730  | 4.742735  | 12.408788 |
| O | 4.658755  | 5.042041  | 19.938456 |
| O | 10.271653 | 10.060772 | 19.928257 |

### Optimized Cartesian coordinates of S4-H using GGA

|   |           |           |          |
|---|-----------|-----------|----------|
| C | -0.005370 | -0.311563 | 9.777830 |
| C | -0.005327 | 2.547193  | 9.794226 |
| C | -0.005418 | 3.976989  | 9.809496 |
| C | -0.005369 | 6.834206  | 9.831841 |
| C | -0.005353 | 8.263556  | 9.832499 |
| C | -0.005360 | 11.120724 | 9.813031 |
| C | 1.232856  | 0.403278  | 9.775839 |
| C | 1.233138  | 1.833205  | 9.783194 |
| C | 1.233264  | 4.691024  | 9.812108 |
| C | 1.233718  | 6.120642  | 9.824543 |
| C | 1.233569  | 8.977379  | 9.827376 |
| C | 1.233407  | 10.407071 | 9.817244 |
| C | 2.471103  | -0.311429 | 9.768911 |
| C | 2.471377  | 2.547538  | 9.779628 |
| C | 2.472329  | 3.977252  | 9.794656 |
| C | 2.472617  | 6.834134  | 9.823833 |
| C | 2.472501  | 8.263761  | 9.826148 |
| C | 2.472340  | 11.120653 | 9.804439 |
| C | 3.708890  | 0.403673  | 9.761164 |
| C | 3.709540  | 1.833618  | 9.763598 |
| C | 3.710729  | 4.691142  | 9.788825 |

|   |           |           |          |
|---|-----------|-----------|----------|
| C | 3.711151  | 6.120568  | 9.810331 |
| C | 3.711031  | 8.977626  | 9.816970 |
| C | 3.710710  | 10.407013 | 9.800964 |
| C | 4.946413  | -0.311554 | 9.752950 |
| C | 4.946912  | 2.549018  | 9.753878 |
| C | 4.947664  | 3.977557  | 9.757609 |
| C | 4.948739  | 6.834561  | 9.807155 |
| C | 4.948723  | 8.263642  | 9.811922 |
| C | 4.947525  | 11.120405 | 9.774473 |
| C | 6.183737  | 0.404244  | 9.745744 |
| C | 6.183965  | 1.833709  | 9.745458 |
| C | 6.184473  | 4.692311  | 9.748408 |
| C | 6.185028  | 6.120923  | 9.774157 |
| C | 6.185138  | 8.977679  | 9.784926 |
| C | 6.184390  | 10.405877 | 9.766635 |
| C | 7.421326  | -0.311545 | 9.746645 |
| C | 7.421158  | 2.549209  | 9.747664 |
| C | 7.421479  | 3.978126  | 9.756187 |
| C | 7.421555  | 6.834491  | 9.799809 |
| C | 7.421634  | 8.263383  | 9.805329 |
| C | 7.421559  | 11.119845 | 9.775437 |
| C | 8.658913  | 0.404059  | 9.746899 |
| C | 8.658945  | 1.834202  | 9.747711 |
| C | 8.658863  | 4.691961  | 9.781502 |
| C | 8.658824  | 6.121287  | 9.802526 |
| C | 8.658816  | 8.976695  | 9.811626 |
| C | 8.658922  | 10.406176 | 9.797562 |
| C | 9.896390  | -0.311650 | 9.748699 |
| C | 9.896495  | 2.549330  | 9.751133 |
| C | 9.896011  | 3.978039  | 9.759653 |
| C | 9.895928  | 6.834365  | 9.801059 |
| C | 9.895818  | 8.263398  | 9.805110 |
| C | 9.895887  | 11.119940 | 9.774056 |
| C | 11.133749 | 0.404320  | 9.750540 |
| C | 11.133379 | 1.833691  | 9.751813 |
| C | 11.133088 | 4.692226  | 9.756778 |
| C | 11.132336 | 6.120746  | 9.780157 |
| C | 11.132300 | 8.977580  | 9.786857 |
| C | 11.133112 | 10.405745 | 9.767007 |
| C | 12.370875 | -0.311574 | 9.757727 |
| C | 12.370456 | 2.548904  | 9.763380 |
| C | 12.369613 | 3.977487  | 9.769025 |
| C | 12.368636 | 6.834301  | 9.814014 |
| C | 12.368593 | 8.263477  | 9.816140 |
| C | 12.369648 | 11.120193 | 9.776628 |
| C | 13.608544 | 0.403453  | 9.767145 |
| C | 13.607821 | 1.833452  | 9.772221 |
| C | 13.606787 | 4.691216  | 9.799096 |
| C | 13.606464 | 6.120555  | 9.818899 |
| C | 13.606602 | 8.977270  | 9.820772 |
| C | 13.606827 | 10.406703 | 9.803001 |
| C | 14.846461 | -0.311541 | 9.772713 |

|   |           |           |           |
|---|-----------|-----------|-----------|
| C | 14.846068 | 2.547454  | 9.787590  |
| C | 14.845229 | 3.977198  | 9.803145  |
| C | 14.845086 | 6.833948  | 9.830597  |
| C | 14.845219 | 8.263517  | 9.831110  |
| C | 14.845204 | 11.120489 | 9.805798  |
| C | 16.084786 | 0.403263  | 9.778586  |
| C | 16.084446 | 1.833134  | 9.787223  |
| C | 16.084374 | 4.691099  | 9.816760  |
| C | 16.084059 | 6.120584  | 9.829000  |
| C | 16.084012 | 8.977299  | 9.829858  |
| C | 16.084282 | 10.406943 | 9.818670  |
| C | -0.005421 | 12.550599 | 9.798222  |
| C | -0.005326 | 15.409231 | 9.779017  |
| C | 1.233040  | 13.265028 | 9.789301  |
| C | 1.233114  | 14.694790 | 9.779531  |
| C | 2.471310  | 12.550367 | 9.789657  |
| C | 2.471276  | 15.409364 | 9.771623  |
| C | 3.709543  | 13.264441 | 9.775478  |
| C | 3.709013  | 14.694330 | 9.767830  |
| C | 4.946936  | 12.548842 | 9.770206  |
| C | 4.946527  | 15.409278 | 9.756868  |
| C | 6.184134  | 13.264134 | 9.761048  |
| C | 6.183770  | 14.693614 | 9.754127  |
| C | 7.421318  | 12.548661 | 9.765917  |
| C | 7.421316  | 15.409341 | 9.750922  |
| C | 8.658767  | 13.264015 | 9.762204  |
| C | 8.658876  | 14.694128 | 9.754729  |
| C | 9.896217  | 12.548609 | 9.765408  |
| C | 9.896584  | 15.409229 | 9.752074  |
| C | 11.133240 | 13.264171 | 9.761403  |
| C | 11.133826 | 14.693520 | 9.755734  |
| C | 12.370395 | 12.548730 | 9.771022  |
| C | 12.371071 | 15.409209 | 9.759517  |
| C | 13.607857 | 13.264365 | 9.776122  |
| C | 13.608567 | 14.694296 | 9.769177  |
| C | 14.846281 | 12.550217 | 9.790457  |
| C | 14.846448 | 15.409168 | 9.773279  |
| C | 16.084589 | 13.264930 | 9.789752  |
| C | 16.084711 | 14.694698 | 9.780090  |
| P | 8.607973  | 7.560037  | 16.103413 |
| W | 8.603143  | 3.932093  | 16.205959 |
| W | 12.232992 | 7.568282  | 16.020425 |
| W | 8.614695  | 11.175823 | 16.243896 |
| W | 4.981183  | 7.564175  | 16.015459 |
| W | 10.351882 | 5.659931  | 18.664704 |
| W | 6.861699  | 9.430414  | 18.687545 |
| W | 6.723879  | 9.317393  | 13.562153 |
| W | 10.496954 | 5.826587  | 13.552862 |
| W | 10.491399 | 9.310857  | 13.559258 |
| W | 6.725729  | 5.831862  | 13.546712 |
| W | 6.866531  | 5.665785  | 18.665561 |
| W | 10.348685 | 9.424762  | 18.697921 |

|   |           |           |           |
|---|-----------|-----------|-----------|
| O | 8.607766  | 6.266948  | 17.010668 |
| O | 9.892930  | 7.565980  | 15.179173 |
| O | 8.609803  | 8.840115  | 17.028545 |
| O | 7.321186  | 7.567612  | 15.181262 |
| O | 8.610377  | 5.930781  | 13.049297 |
| O | 10.250171 | 7.541649  | 19.142064 |
| O | 8.609237  | 9.218053  | 13.054512 |
| O | 6.967923  | 7.547081  | 19.135827 |
| O | 11.568648 | 8.869839  | 17.290879 |
| O | 5.651202  | 6.241053  | 17.267909 |
| O | 9.920099  | 10.505154 | 14.961844 |
| O | 7.294348  | 4.621195  | 14.936679 |
| O | 7.305794  | 10.508672 | 14.961196 |
| O | 9.915023  | 4.620532  | 14.939185 |
| O | 5.643288  | 8.873013  | 17.286381 |
| O | 11.560596 | 6.236406  | 17.265739 |
| O | 8.608315  | 5.403951  | 19.511102 |
| O | 10.761458 | 7.572167  | 12.674304 |
| O | 8.606234  | 9.682466  | 19.535481 |
| O | 6.458481  | 7.579018  | 12.674066 |
| O | 7.261875  | 4.069010  | 17.610600 |
| O | 9.955272  | 11.026439 | 17.647776 |
| O | 5.134759  | 6.235038  | 14.590188 |
| O | 12.084367 | 8.903871  | 14.604482 |
| O | 12.083055 | 6.231615  | 14.595518 |
| O | 5.133236  | 8.908436  | 14.603277 |
| O | 9.945176  | 4.066136  | 17.611389 |
| O | 7.266166  | 11.029831 | 17.643521 |
| O | 8.604549  | 2.243279  | 15.873746 |
| O | 13.926391 | 7.564058  | 16.328959 |
| O | 8.615782  | 12.868248 | 15.931284 |
| O | 3.286650  | 7.560049  | 16.318522 |
| O | 11.416372 | 5.024550  | 19.866457 |
| O | 5.800397  | 10.053675 | 19.898935 |
| O | 6.077174  | 10.414559 | 12.384169 |
| O | 11.140334 | 4.737399  | 12.365231 |
| O | 11.136480 | 10.410259 | 12.381940 |
| O | 6.080243  | 4.748002  | 12.355981 |
| O | 5.802964  | 5.034573  | 19.869218 |
| O | 11.407357 | 10.044775 | 19.913509 |

#### **Optimized Cartesian coordinates of S4-T using GGA**

|   |           |           |          |
|---|-----------|-----------|----------|
| C | -0.006660 | -0.313621 | 9.720871 |
| C | -0.006374 | 2.545167  | 9.737385 |
| C | -0.006016 | 3.974777  | 9.751615 |
| C | -0.005941 | 6.831737  | 9.774673 |
| C | -0.006060 | 8.261237  | 9.777622 |
| C | -0.006143 | 11.118711 | 9.759306 |
| C | 1.231635  | 0.401412  | 9.724137 |
| C | 1.232253  | 1.831146  | 9.731697 |

|   |           |           |          |
|---|-----------|-----------|----------|
| C | 1.232607  | 4.688765  | 9.762167 |
| C | 1.232834  | 6.118003  | 9.777023 |
| C | 1.232451  | 8.975241  | 9.784349 |
| C | 1.232216  | 10.404351 | 9.774042 |
| C | 2.469754  | -0.313381 | 9.725739 |
| C | 2.470055  | 2.545562  | 9.738945 |
| C | 2.471457  | 3.974925  | 9.755669 |
| C | 2.471261  | 6.831328  | 9.794695 |
| C | 2.471203  | 8.260884  | 9.798688 |
| C | 2.471219  | 11.117962 | 9.776918 |
| C | 3.707276  | 0.402341  | 9.729798 |
| C | 3.708104  | 1.831913  | 9.735459 |
| C | 3.708406  | 4.688703  | 9.768542 |
| C | 3.708800  | 6.117096  | 9.801729 |
| C | 3.708064  | 8.974598  | 9.812035 |
| C | 3.707709  | 10.403644 | 9.801733 |
| C | 4.944583  | -0.313522 | 9.733397 |
| C | 4.944842  | 2.547068  | 9.743179 |
| C | 4.945672  | 3.974554  | 9.754773 |
| C | 4.945447  | 6.831712  | 9.826141 |
| C | 4.945195  | 8.259379  | 9.829645 |
| C | 4.945243  | 11.118054 | 9.805194 |
| C | 6.181955  | 0.402652  | 9.739272 |
| C | 6.181854  | 1.831896  | 9.748359 |
| C | 6.182731  | 4.689507  | 9.791154 |
| C | 6.183231  | 6.116501  | 9.835086 |
| C | 6.182813  | 8.974121  | 9.846364 |
| C | 6.182518  | 10.402904 | 9.827315 |
| C | 7.419248  | -0.313183 | 9.740692 |
| C | 7.419119  | 2.546101  | 9.763084 |
| C | 7.419341  | 3.975210  | 9.793042 |
| C | 7.419608  | 6.829740  | 9.870195 |
| C | 7.419635  | 8.259761  | 9.870602 |
| C | 7.419588  | 11.117063 | 9.816842 |
| C | 8.656684  | 0.402673  | 9.740443 |
| C | 8.656660  | 1.831820  | 9.749384 |
| C | 8.656228  | 4.689253  | 9.792314 |
| C | 8.656017  | 6.116488  | 9.834277 |
| C | 8.656601  | 8.974211  | 9.844797 |
| C | 8.656818  | 10.402964 | 9.825974 |
| C | 9.894106  | -0.313668 | 9.735354 |
| C | 9.893893  | 2.546896  | 9.745265 |
| C | 9.893082  | 3.974397  | 9.755362 |
| C | 9.893839  | 6.831628  | 9.821568 |
| C | 9.894146  | 8.259347  | 9.824899 |
| C | 9.894118  | 11.117939 | 9.801835 |
| C | 11.131356 | 0.402140  | 9.732862 |
| C | 11.130473 | 1.831714  | 9.738870 |
| C | 11.130563 | 4.688676  | 9.767501 |
| C | 11.130388 | 6.116891  | 9.798486 |
| C | 11.131217 | 8.974484  | 9.805875 |
| C | 11.131516 | 10.403510 | 9.796338 |

|   |           |           |          |
|---|-----------|-----------|----------|
| C | 12.368819 | -0.313655 | 9.728312 |
| C | 12.368514 | 2.545399  | 9.742437 |
| C | 12.367356 | 3.974727  | 9.757398 |
| C | 12.367942 | 6.831164  | 9.791597 |
| C | 12.368026 | 8.260673  | 9.793978 |
| C | 12.368029 | 11.117834 | 9.772586 |
| C | 13.606801 | 0.401202  | 9.726667 |
| C | 13.606192 | 1.830998  | 9.734602 |
| C | 13.606203 | 4.688452  | 9.763216 |
| C | 13.606212 | 6.117615  | 9.775991 |
| C | 13.606682 | 8.975000  | 9.780858 |
| C | 13.606867 | 10.403973 | 9.770357 |
| C | 14.845048 | -0.313716 | 9.722146 |
| C | 14.844741 | 2.544962  | 9.738926 |
| C | 14.844659 | 3.974568  | 9.752643 |
| C | 14.844733 | 6.831601  | 9.774004 |
| C | 14.844995 | 8.261119  | 9.776106 |
| C | 14.844756 | 11.118462 | 9.757480 |
| C | 16.083399 | 0.401163  | 9.722698 |
| C | 16.083406 | 1.830912  | 9.731346 |
| C | 16.083568 | 4.688576  | 9.757782 |
| C | 16.083564 | 6.117897  | 9.767918 |
| C | 16.083677 | 8.975412  | 9.772351 |
| C | 16.083598 | 10.404591 | 9.763064 |
| C | -0.006432 | 12.548445 | 9.744323 |
| C | -0.006660 | 15.407306 | 9.722700 |
| C | 1.232080  | 13.262879 | 9.741903 |
| C | 1.231758  | 14.692543 | 9.729521 |
| C | 2.469967  | 12.547698 | 9.758431 |
| C | 2.469775  | 15.407437 | 9.729636 |
| C | 3.707614  | 13.262572 | 9.758104 |
| C | 3.707238  | 14.692057 | 9.740458 |
| C | 4.944796  | 12.546199 | 9.778040 |
| C | 4.944639  | 15.407846 | 9.739624 |
| C | 6.182323  | 13.262494 | 9.772065 |
| C | 6.182062  | 14.691911 | 9.750745 |
| C | 7.419428  | 12.547021 | 9.787389 |
| C | 7.419336  | 15.407685 | 9.745631 |
| C | 8.656512  | 13.262510 | 9.771348 |
| C | 8.656663  | 14.691854 | 9.750945 |
| C | 9.894135  | 12.546110 | 9.775756 |
| C | 9.894330  | 15.407572 | 9.740535 |
| C | 11.131351 | 13.262359 | 9.756051 |
| C | 11.131661 | 14.691817 | 9.740564 |
| C | 12.369044 | 12.547462 | 9.755666 |
| C | 12.369010 | 15.407328 | 9.730645 |
| C | 13.606715 | 13.262769 | 9.740519 |
| C | 13.606935 | 14.692409 | 9.729743 |
| C | 14.845101 | 12.548200 | 9.743128 |
| C | 14.845045 | 15.407244 | 9.723272 |
| C | 16.083521 | 13.263035 | 9.735292 |
| C | 16.083401 | 14.692723 | 9.725218 |



|   |           |           |           |
|---|-----------|-----------|-----------|
| P | 7.458155  | 6.836507  | 16.139892 |
| W | 7.461678  | 3.213467  | 16.248326 |
| W | 11.082399 | 6.843016  | 16.042150 |
| W | 7.454672  | 10.460322 | 16.271319 |
| W | 3.833654  | 6.827528  | 16.051029 |
| W | 9.209005  | 4.950169  | 18.704345 |
| W | 5.712794  | 8.707711  | 18.718851 |
| W | 5.570342  | 8.587965  | 13.595907 |
| W | 9.339128  | 5.100199  | 13.577519 |
| W | 9.334302  | 8.593135  | 13.589531 |
| W | 5.577666  | 5.095393  | 13.578809 |
| W | 5.719816  | 4.946050  | 18.711449 |
| W | 9.203108  | 8.712406  | 18.718113 |
| O | 7.461424  | 5.547227  | 17.051468 |
| O | 8.740842  | 6.838503  | 15.213958 |
| O | 7.459358  | 8.122413  | 17.056304 |
| O | 6.171716  | 6.835009  | 15.219003 |
| O | 7.458480  | 5.191353  | 13.051054 |
| O | 9.100234  | 6.828678  | 19.177012 |
| O | 7.452972  | 8.496325  | 13.080236 |
| O | 5.822222  | 6.824977  | 19.179445 |
| O | 10.420179 | 8.150663  | 17.318144 |
| O | 4.499628  | 5.512891  | 17.315793 |
| O | 8.758794  | 9.790010  | 14.985902 |
| O | 6.157549  | 3.890813  | 14.963343 |
| O | 6.144670  | 9.785169  | 14.990042 |
| O | 8.766578  | 3.893649  | 14.963048 |
| O | 4.496078  | 8.141371  | 17.321296 |
| O | 10.422978 | 5.522727  | 17.307494 |
| O | 7.465070  | 4.681574  | 19.546024 |
| O | 9.595708  | 6.853326  | 12.716861 |
| O | 7.458259  | 8.968386  | 19.556973 |
| O | 5.315307  | 6.845821  | 12.721025 |
| O | 6.117457  | 3.353070  | 17.647122 |
| O | 8.801123  | 10.313468 | 17.668655 |
| O | 3.988864  | 5.495710  | 14.630845 |
| O | 10.927611 | 8.185906  | 14.632672 |
| O | 10.928867 | 5.508454  | 14.624106 |
| O | 3.981658  | 8.171474  | 14.639901 |
| O | 8.809943  | 3.355396  | 17.643620 |
| O | 6.110420  | 10.309303 | 17.670232 |
| O | 7.462772  | 1.523489  | 15.922839 |
| O | 12.777487 | 6.842203  | 16.340722 |
| O | 7.452694  | 12.153140 | 15.960979 |
| O | 2.139576  | 6.823812  | 16.355749 |
| O | 10.269310 | 4.318953  | 19.912680 |
| O | 4.653083  | 9.327428  | 19.933721 |
| O | 4.920078  | 9.670619  | 12.406132 |
| O | 10.004723 | 4.030988  | 12.385060 |
| O | 9.976934  | 9.679295  | 12.398900 |
| O | 4.915624  | 4.022642  | 12.387757 |
| O | 4.662874  | 4.314890  | 19.922863 |

O 10.261652 9.336114 19.932031

### Optimized Cartesian coordinates of C3-B using GGA

|   |           |           |          |
|---|-----------|-----------|----------|
| C | -0.002645 | -0.363175 | 9.766792 |
| C | -0.002684 | 2.495825  | 9.751591 |
| C | -0.002494 | 3.925386  | 9.753356 |
| C | -0.002514 | 6.783367  | 9.772572 |
| C | -0.002282 | 8.212648  | 9.786520 |
| C | -0.002130 | 11.069877 | 9.804470 |
| C | 1.235466  | 0.351375  | 9.760506 |
| C | 1.235555  | 1.781153  | 9.751788 |
| C | 1.235795  | 4.639580  | 9.758228 |
| C | 1.236077  | 6.069097  | 9.770490 |
| C | 1.236389  | 8.926134  | 9.802544 |
| C | 1.236058  | 10.355286 | 9.813280 |
| C | 2.473429  | -0.363527 | 9.768683 |
| C | 2.473500  | 2.495897  | 9.748293 |
| C | 2.474010  | 3.925411  | 9.753687 |
| C | 2.474191  | 6.782800  | 9.786692 |
| C | 2.474977  | 8.212408  | 9.806163 |
| C | 2.474991  | 11.068653 | 9.831226 |
| C | 3.711045  | 0.351490  | 9.758508 |
| C | 3.711432  | 1.780968  | 9.745826 |
| C | 3.711530  | 4.640137  | 9.759837 |
| C | 3.711672  | 6.068705  | 9.783946 |
| C | 3.711742  | 8.924994  | 9.831701 |
| C | 3.711621  | 10.353701 | 9.849177 |
| C | 4.948605  | -0.363685 | 9.768364 |
| C | 4.948792  | 2.496104  | 9.737433 |
| C | 4.949652  | 3.925746  | 9.745253 |
| C | 4.950040  | 6.783395  | 9.807164 |
| C | 4.949270  | 8.210709  | 9.832934 |
| C | 4.949110  | 11.068167 | 9.865864 |
| C | 6.185725  | 0.351948  | 9.753734 |
| C | 6.185789  | 1.781271  | 9.735092 |
| C | 6.185898  | 4.639317  | 9.751612 |
| C | 6.186577  | 6.067766  | 9.796095 |
| C | 6.186436  | 8.924754  | 9.855859 |
| C | 6.186398  | 10.353337 | 9.872521 |
| C | 7.423264  | -0.363529 | 9.764817 |
| C | 7.423232  | 2.498055  | 9.725953 |
| C | 7.423108  | 3.924868  | 9.729061 |
| C | 7.423647  | 6.781818  | 9.819013 |
| C | 7.423531  | 8.210918  | 9.851187 |
| C | 7.423672  | 11.067793 | 9.873546 |
| C | 8.660809  | 0.352125  | 9.751358 |
| C | 8.660648  | 1.781470  | 9.732402 |
| C | 8.660766  | 4.639576  | 9.746523 |
| C | 8.660535  | 6.067952  | 9.790894 |
| C | 8.660835  | 8.924948  | 9.854320 |

|   |           |           |          |
|---|-----------|-----------|----------|
| C | 8.661153  | 10.353470 | 9.871543 |
| C | 9.898312  | -0.363356 | 9.764487 |
| C | 9.897787  | 2.496354  | 9.732823 |
| C | 9.896921  | 3.926088  | 9.739955 |
| C | 9.897029  | 6.783709  | 9.801308 |
| C | 9.897976  | 8.210943  | 9.826675 |
| C | 9.898402  | 11.068474 | 9.861877 |
| C | 11.135891 | 0.351728  | 9.753698 |
| C | 11.135306 | 1.781422  | 9.740582 |
| C | 11.135202 | 4.640461  | 9.753629 |
| C | 11.135430 | 6.069011  | 9.777686 |
| C | 11.135745 | 8.925305  | 9.823203 |
| C | 11.135917 | 10.354096 | 9.841863 |
| C | 12.373507 | -0.363321 | 9.764043 |
| C | 12.373280 | 2.496188  | 9.742964 |
| C | 12.372736 | 3.925685  | 9.747988 |
| C | 12.372840 | 6.782995  | 9.780182 |
| C | 12.372235 | 8.212611  | 9.799046 |
| C | 12.372390 | 11.068971 | 9.824954 |
| C | 13.611375 | 0.351674  | 9.756719 |
| C | 13.611140 | 1.781349  | 9.747660 |
| C | 13.611002 | 4.639806  | 9.753717 |
| C | 13.610754 | 6.069093  | 9.765520 |
| C | 13.610830 | 8.926357  | 9.796996 |
| C | 13.611213 | 10.355453 | 9.808118 |
| C | 14.849344 | -0.363157 | 9.764627 |
| C | 14.849392 | 2.495849  | 9.749115 |
| C | 14.849025 | 3.925310  | 9.750490 |
| C | 14.849290 | 6.783438  | 9.769514 |
| C | 14.849262 | 8.212681  | 9.783254 |
| C | 14.849221 | 11.069975 | 9.801820 |
| C | 16.087466 | 0.351422  | 9.759694 |
| C | 16.087481 | 1.781152  | 9.752804 |
| C | 16.087420 | 4.639518  | 9.755103 |
| C | 16.087531 | 6.069171  | 9.763311 |
| C | 16.087671 | 8.926680  | 9.788738 |
| C | 16.087759 | 10.355978 | 9.797054 |
| C | -0.002505 | 12.499345 | 9.803459 |
| C | -0.002560 | 15.357916 | 9.780930 |
| C | 1.236001  | 13.213395 | 9.808426 |
| C | 1.235515  | 14.643021 | 9.793952 |
| C | 2.473737  | 12.498347 | 9.826589 |
| C | 2.473636  | 15.357602 | 9.789551 |
| C | 3.711440  | 13.212727 | 9.831200 |
| C | 3.711189  | 14.642339 | 9.807237 |
| C | 4.948648  | 12.496840 | 9.850900 |
| C | 4.948728  | 15.357722 | 9.796975 |
| C | 6.186113  | 13.212589 | 9.844932 |
| C | 6.186031  | 14.642026 | 9.814424 |
| C | 7.423481  | 12.497789 | 9.858954 |
| C | 7.423415  | 15.358089 | 9.797450 |
| C | 8.660643  | 13.212871 | 9.843653 |

|   |           |           |           |
|---|-----------|-----------|-----------|
| C | 8.660807  | 14.642253 | 9.813132  |
| C | 9.898497  | 12.497245 | 9.847788  |
| C | 9.898222  | 15.357995 | 9.793823  |
| C | 11.135706 | 13.213178 | 9.826901  |
| C | 11.135856 | 14.642643 | 9.803123  |
| C | 12.373343 | 12.498608 | 9.821903  |
| C | 12.373476 | 15.357879 | 9.785261  |
| C | 13.610999 | 13.213682 | 9.804832  |
| C | 13.611411 | 14.643208 | 9.790447  |
| C | 14.849367 | 12.499423 | 9.801242  |
| C | 14.849411 | 15.358019 | 9.778876  |
| C | 16.087571 | 13.213847 | 9.795565  |
| C | 16.087570 | 14.643469 | 9.785529  |
| P | 7.472878  | 7.663070  | 16.782772 |
| W | 5.739908  | 6.528252  | 19.770549 |
| W | 9.199231  | 4.469881  | 16.644069 |
| W | 9.349506  | 8.877074  | 13.927673 |
| W | 5.604785  | 10.769149 | 16.833243 |
| W | 9.226130  | 6.558915  | 19.773499 |
| W | 9.368870  | 10.751319 | 16.865937 |
| W | 5.576777  | 8.848589  | 13.929408 |
| W | 5.711503  | 4.489298  | 16.605690 |
| W | 7.489896  | 5.598897  | 13.826957 |
| W | 3.850831  | 7.757380  | 16.753624 |
| W | 7.456376  | 9.558943  | 19.879047 |
| W | 11.091478 | 7.723523  | 16.716062 |
| O | 7.473635  | 7.601530  | 18.361725 |
| O | 7.468734  | 6.193619  | 16.199058 |
| O | 8.762723  | 8.424257  | 16.277928 |
| O | 6.186430  | 8.429418  | 16.278223 |
| O | 4.501802  | 5.973811  | 16.328764 |
| O | 10.437243 | 7.401819  | 18.523864 |
| O | 6.161153  | 7.016868  | 13.659932 |
| O | 8.792529  | 10.246975 | 18.640644 |
| O | 10.423575 | 5.951438  | 16.327790 |
| O | 6.156590  | 10.255252 | 18.627812 |
| O | 8.790990  | 7.024019  | 13.654599 |
| O | 4.519527  | 7.410958  | 18.535296 |
| O | 7.466036  | 9.288818  | 13.731061 |
| O | 5.821142  | 5.124616  | 18.443272 |
| O | 7.485142  | 11.094760 | 16.515532 |
| O | 9.115872  | 5.124398  | 18.460828 |
| O | 8.810590  | 8.302959  | 20.532573 |
| O | 6.126986  | 4.507975  | 14.700301 |
| O | 10.955230 | 9.645561  | 17.071336 |
| O | 3.997788  | 8.193417  | 14.838245 |
| O | 6.131120  | 8.291204  | 20.533616 |
| O | 10.936967 | 8.185920  | 14.820855 |
| O | 4.004115  | 9.672591  | 17.075308 |
| O | 8.812973  | 4.497089  | 14.715174 |
| O | 7.455750  | 3.638017  | 16.864057 |
| O | 5.348573  | 10.513752 | 14.911258 |

|   |           |           |           |
|---|-----------|-----------|-----------|
| O | 7.479705  | 5.977596  | 20.449478 |
| O | 9.602154  | 10.515740 | 14.924240 |
| O | 4.679029  | 5.871332  | 20.965821 |
| O | 10.259754 | 3.118007  | 16.772853 |
| O | 9.980983  | 9.315041  | 12.366463 |
| O | 4.972766  | 12.354687 | 17.065040 |
| O | 10.287370 | 5.907572  | 20.970866 |
| O | 10.010462 | 12.332327 | 17.108804 |
| O | 4.938497  | 9.287332  | 12.371273 |
| O | 4.642880  | 3.143069  | 16.725113 |
| O | 7.485981  | 4.911717  | 12.230665 |
| O | 2.156094  | 7.507313  | 16.926878 |
| O | 7.455658  | 10.741085 | 21.139420 |
| O | 12.786136 | 7.464748  | 16.876969 |

### Optimized Cartesian coordinates of C3-H using GGA

|   |           |           |          |
|---|-----------|-----------|----------|
| C | -0.002758 | -0.312984 | 9.821568 |
| C | -0.002735 | 2.545998  | 9.824277 |
| C | -0.002699 | 3.975614  | 9.822914 |
| C | -0.002565 | 6.833187  | 9.814407 |
| C | -0.002522 | 8.262466  | 9.812515 |
| C | -0.002484 | 11.119683 | 9.812560 |
| C | 1.235334  | 0.401832  | 9.819681 |
| C | 1.235754  | 1.831620  | 9.821257 |
| C | 1.235799  | 4.690002  | 9.819203 |
| C | 1.236087  | 6.119429  | 9.814372 |
| C | 1.236212  | 8.976365  | 9.809827 |
| C | 1.236081  | 10.405742 | 9.810279 |
| C | 2.473569  | -0.313010 | 9.815753 |
| C | 2.473785  | 2.546115  | 9.817002 |
| C | 2.474342  | 3.975741  | 9.816766 |
| C | 2.474460  | 6.833241  | 9.807647 |
| C | 2.474926  | 8.262453  | 9.804701 |
| C | 2.474889  | 11.119189 | 9.807745 |
| C | 3.711316  | 0.402233  | 9.810874 |
| C | 3.711792  | 1.831778  | 9.810652 |
| C | 3.712349  | 4.690412  | 9.810786 |
| C | 3.712847  | 6.119585  | 9.806082 |
| C | 3.713688  | 8.975678  | 9.795813 |
| C | 3.712568  | 10.404903 | 9.799649 |
| C | 4.949222  | -0.312629 | 9.807881 |
| C | 4.949449  | 2.546805  | 9.804203 |
| C | 4.950406  | 3.976082  | 9.804650 |
| C | 4.950655  | 6.834289  | 9.798279 |
| C | 4.950666  | 8.262233  | 9.781919 |
| C | 4.950783  | 11.118428 | 9.795080 |
| C | 6.186704  | 0.403012  | 9.803202 |
| C | 6.187240  | 1.832524  | 9.799651 |
| C | 6.188287  | 4.690754  | 9.797426 |
| C | 6.187685  | 6.119549  | 9.801227 |
| C | 6.187988  | 8.976106  | 9.769959 |

|   |           |           |          |
|---|-----------|-----------|----------|
| C | 6.187294  | 10.404437 | 9.780481 |
| C | 7.424094  | -0.312662 | 9.801664 |
| C | 7.424436  | 2.548420  | 9.790854 |
| C | 7.424851  | 3.976333  | 9.779993 |
| C | 7.425073  | 6.833776  | 9.800032 |
| C | 7.424732  | 8.261990  | 9.788331 |
| C | 7.424070  | 11.118321 | 9.796516 |
| C | 8.661441  | 0.403377  | 9.798794 |
| C | 8.661511  | 1.832560  | 9.793032 |
| C | 8.661727  | 4.691346  | 9.770286 |
| C | 8.661819  | 6.119550  | 9.788547 |
| C | 8.661901  | 8.975600  | 9.799077 |
| C | 8.661852  | 10.404519 | 9.800187 |
| C | 9.898650  | -0.312711 | 9.802988 |
| C | 9.898530  | 2.548348  | 9.792743 |
| C | 9.898193  | 3.976587  | 9.782805 |
| C | 9.898323  | 6.833920  | 9.799506 |
| C | 9.898817  | 8.261941  | 9.787075 |
| C | 9.899455  | 11.118364 | 9.797120 |
| C | 11.136009 | 0.403001  | 9.805806 |
| C | 11.135559 | 1.832531  | 9.802415 |
| C | 11.135024 | 4.690919  | 9.799463 |
| C | 11.135850 | 6.119774  | 9.801823 |
| C | 11.135731 | 8.976303  | 9.769602 |
| C | 11.136265 | 10.404493 | 9.780466 |
| C | 12.373505 | -0.312609 | 9.811096 |
| C | 12.373431 | 2.546892  | 9.807671 |
| C | 12.372725 | 3.976189  | 9.807622 |
| C | 12.372795 | 6.834434  | 9.800609 |
| C | 12.372759 | 8.262699  | 9.783957 |
| C | 12.372509 | 11.118688 | 9.795364 |
| C | 13.611363 | 0.402323  | 9.814309 |
| C | 13.610993 | 1.831833  | 9.814278 |
| C | 13.610713 | 4.690564  | 9.813995 |
| C | 13.610391 | 6.119827  | 9.809429 |
| C | 13.609865 | 8.976177  | 9.797282 |
| C | 13.610842 | 10.405270 | 9.800167 |
| C | 14.849185 | -0.312944 | 9.818601 |
| C | 14.849017 | 2.546108  | 9.819808 |
| C | 14.848728 | 3.975867  | 9.819684 |
| C | 14.848843 | 6.833453  | 9.810669 |
| C | 14.848609 | 8.262665  | 9.807119 |
| C | 14.848523 | 11.119480 | 9.808808 |
| C | 16.087427 | 0.401859  | 9.821500 |
| C | 16.087103 | 1.831598  | 9.822927 |
| C | 16.087275 | 4.690036  | 9.820902 |
| C | 16.087129 | 6.119464  | 9.816172 |
| C | 16.087224 | 8.976530  | 9.811075 |
| C | 16.087373 | 10.405914 | 9.811205 |
| C | -0.002541 | 12.549264 | 9.814515 |
| C | -0.002695 | 15.408062 | 9.819129 |
| C | 1.235870  | 13.263761 | 9.814355 |

|   |           |           |           |
|---|-----------|-----------|-----------|
| C | 1.235572  | 14.693395 | 9.816943  |
| C | 2.473857  | 12.548974 | 9.811099  |
| C | 2.473673  | 15.408001 | 9.815589  |
| C | 3.711985  | 13.263336 | 9.810275  |
| C | 3.711530  | 14.693027 | 9.812492  |
| C | 4.949455  | 12.547798 | 9.803418  |
| C | 4.949089  | 15.408224 | 9.809260  |
| C | 6.186759  | 13.263410 | 9.803235  |
| C | 6.186502  | 14.693011 | 9.805859  |
| C | 7.424058  | 12.547724 | 9.802066  |
| C | 7.423964  | 15.408467 | 9.804209  |
| C | 8.661511  | 13.263225 | 9.804683  |
| C | 8.661468  | 14.692840 | 9.805150  |
| C | 9.898984  | 12.547714 | 9.802706  |
| C | 9.898883  | 15.408410 | 9.805420  |
| C | 11.136185 | 13.263460 | 9.804731  |
| C | 11.136333 | 14.692990 | 9.807951  |
| C | 12.373553 | 12.548084 | 9.804732  |
| C | 12.373681 | 15.408327 | 9.811976  |
| C | 13.611028 | 13.263513 | 9.811990  |
| C | 13.611323 | 14.693194 | 9.814927  |
| C | 14.849350 | 12.549219 | 9.812379  |
| C | 14.849158 | 15.408038 | 9.817881  |
| C | 16.087399 | 13.263845 | 9.815292  |
| C | 16.087386 | 14.693501 | 9.818096  |
| P | 8.602307  | 7.570683  | 16.771772 |
| W | 6.860607  | 6.576537  | 19.802054 |
| W | 10.351482 | 4.391801  | 16.731907 |
| W | 10.490096 | 8.647256  | 13.883268 |
| W | 6.719239  | 10.667723 | 16.726811 |
| W | 10.345203 | 6.566777  | 19.802020 |
| W | 10.483838 | 10.672585 | 16.716559 |
| W | 6.718388  | 8.654620  | 13.881583 |
| W | 6.864181  | 4.385861  | 16.741591 |
| W | 8.597591  | 5.383929  | 13.889928 |
| W | 4.978943  | 7.645386  | 16.725164 |
| W | 8.612099  | 9.590545  | 19.795195 |
| W | 12.229792 | 7.653729  | 16.732835 |
| O | 8.605968  | 7.575245  | 18.351412 |
| O | 8.605280  | 6.081087  | 16.243152 |
| O | 9.887450  | 8.317915  | 16.236135 |
| O | 7.311246  | 8.311079  | 16.239873 |
| O | 5.643145  | 5.856054  | 16.390162 |
| O | 11.564472 | 7.384161  | 18.532654 |
| O | 7.287823  | 6.805040  | 13.667252 |
| O | 9.924430  | 10.235993 | 18.524173 |
| O | 11.567391 | 5.861000  | 16.388293 |
| O | 7.289931  | 10.234989 | 18.526873 |
| O | 9.912712  | 6.801446  | 13.672151 |
| O | 5.641424  | 7.385334  | 18.531307 |
| O | 8.604863  | 9.076226  | 13.656841 |
| O | 6.962436  | 5.106250  | 18.537953 |

|   |           |           |           |
|---|-----------|-----------|-----------|
| O | 8.603734  | 10.992953 | 16.378424 |
| O | 10.250273 | 5.102868  | 18.535613 |
| O | 9.947704  | 8.350939  | 20.493185 |
| O | 7.258499  | 4.330547  | 14.820745 |
| O | 12.079818 | 9.580052  | 16.992409 |
| O | 5.134109  | 8.020060  | 14.809208 |
| O | 7.267821  | 8.354852  | 20.492603 |
| O | 12.074838 | 8.018988  | 14.811852 |
| O | 5.127223  | 9.576077  | 16.993959 |
| O | 9.945227  | 4.332267  | 14.816400 |
| O | 8.607420  | 3.556496  | 17.009071 |
| O | 6.479839  | 10.343193 | 14.806238 |
| O | 8.603631  | 6.032540  | 20.498957 |
| O | 10.732130 | 10.342896 | 14.800906 |
| O | 5.800672  | 5.966670  | 21.022112 |
| O | 11.417331 | 3.049870  | 16.911541 |
| O | 11.147500 | 9.018685  | 12.317376 |
| O | 6.082778  | 12.259287 | 16.901346 |
| O | 11.405816 | 5.957179  | 21.021860 |
| O | 11.121227 | 12.263918 | 16.886798 |
| O | 6.054096  | 9.029746  | 12.318876 |
| O | 5.802197  | 3.041111  | 16.923723 |
| O | 8.598188  | 4.622796  | 12.326355 |
| O | 3.284231  | 7.394523  | 16.902007 |
| O | 8.613042  | 10.817432 | 21.011030 |
| O | 13.924323 | 7.403535  | 16.912275 |

### Optimized Cartesian coordinates of C3-T using GGA

|   |           |           |          |
|---|-----------|-----------|----------|
| C | -0.009316 | -0.310637 | 9.830467 |
| C | -0.009042 | 2.548008  | 9.828625 |
| C | -0.009088 | 3.977633  | 9.822995 |
| C | -0.008847 | 6.834902  | 9.809283 |
| C | -0.008943 | 8.264291  | 9.806324 |
| C | -0.009040 | 11.121778 | 9.812435 |
| C | 1.228679  | 0.404149  | 9.826748 |
| C | 1.229247  | 1.833856  | 9.826611 |
| C | 1.229375  | 4.692051  | 9.818188 |
| C | 1.229977  | 6.121476  | 9.810619 |
| C | 1.230000  | 8.978247  | 9.803678 |
| C | 1.229415  | 10.407628 | 9.806071 |
| C | 2.466737  | -0.310557 | 9.820473 |
| C | 2.467198  | 2.548313  | 9.821050 |
| C | 2.467689  | 3.977861  | 9.819401 |
| C | 2.467981  | 6.835275  | 9.805080 |
| C | 2.468602  | 8.264387  | 9.797862 |
| C | 2.467615  | 11.121201 | 9.803999 |
| C | 3.704387  | 0.404603  | 9.814000 |
| C | 3.705254  | 1.834102  | 9.814902 |
| C | 3.705614  | 4.692436  | 9.815514 |
| C | 3.706072  | 6.121834  | 9.808275 |
| C | 3.705804  | 8.977698  | 9.783539 |



|   |           |           |          |
|---|-----------|-----------|----------|
| C | 3.705033  | 10.405840 | 9.793931 |
| C | 4.942155  | -0.310458 | 9.805646 |
| C | 4.942267  | 2.549001  | 9.807693 |
| C | 4.943369  | 3.978056  | 9.811206 |
| C | 4.942696  | 6.835148  | 9.800239 |
| C | 4.942702  | 8.263612  | 9.779350 |
| C | 4.942122  | 11.121074 | 9.793872 |
| C | 6.179391  | 0.405441  | 9.799631 |
| C | 6.180327  | 1.835008  | 9.798133 |
| C | 6.179890  | 4.692655  | 9.806587 |
| C | 6.179129  | 6.121043  | 9.822672 |
| C | 6.179526  | 8.977773  | 9.791355 |
| C | 6.179014  | 10.405889 | 9.791851 |
| C | 7.416516  | -0.310354 | 9.796538 |
| C | 7.416403  | 2.549436  | 9.786521 |
| C | 7.416487  | 3.978446  | 9.788700 |
| C | 7.416574  | 6.835393  | 9.825395 |
| C | 7.416636  | 8.263850  | 9.811374 |
| C | 7.416685  | 11.120599 | 9.792391 |
| C | 8.653703  | 0.405410  | 9.799869 |
| C | 8.652576  | 1.835059  | 9.798548 |
| C | 8.653260  | 4.692769  | 9.802715 |
| C | 8.654133  | 6.120963  | 9.816955 |
| C | 8.653810  | 8.977528  | 9.784851 |
| C | 8.654281  | 10.405714 | 9.786825 |
| C | 9.891016  | -0.310409 | 9.805620 |
| C | 9.890669  | 2.548836  | 9.807621 |
| C | 9.889669  | 3.978069  | 9.808332 |
| C | 9.890613  | 6.834986  | 9.789248 |
| C | 9.890579  | 8.263373  | 9.766978 |
| C | 9.891331  | 11.120894 | 9.786126 |
| C | 11.128850 | 0.404499  | 9.813853 |
| C | 11.127894 | 1.834190  | 9.814641 |
| C | 11.127592 | 4.692347  | 9.810257 |
| C | 11.127292 | 6.121599  | 9.798592 |
| C | 11.127791 | 8.977808  | 9.769529 |
| C | 11.128407 | 10.405603 | 9.783152 |
| C | 12.366517 | -0.310619 | 9.820300 |
| C | 12.365998 | 2.548227  | 9.820427 |
| C | 12.365504 | 3.977801  | 9.816845 |
| C | 12.365359 | 6.835332  | 9.796007 |
| C | 12.364792 | 8.264384  | 9.786752 |
| C | 12.365830 | 11.121244 | 9.796036 |
| C | 13.604529 | 0.403989  | 9.826830 |
| C | 13.603899 | 1.833774  | 9.826572 |
| C | 13.603834 | 4.692092  | 9.815684 |
| C | 13.603141 | 6.121390  | 9.805686 |
| C | 13.603346 | 8.978370  | 9.796106 |
| C | 13.604014 | 10.407628 | 9.799285 |
| C | 14.842450 | -0.310696 | 9.830564 |
| C | 14.842189 | 2.548044  | 9.828576 |
| C | 14.842158 | 3.977635  | 9.822180 |

|   |           |           |           |
|---|-----------|-----------|-----------|
| C | 14.842015 | 6.834971  | 9.806319  |
| C | 14.842237 | 8.264293  | 9.802441  |
| C | 14.842269 | 11.121791 | 9.809445  |
| C | 16.080783 | 0.404056  | 9.832130  |
| C | 16.080693 | 1.833779  | 9.830813  |
| C | 16.080718 | 4.691873  | 9.819289  |
| C | 16.080676 | 6.121259  | 9.811782  |
| C | 16.080859 | 8.978509  | 9.805340  |
| C | 16.080856 | 10.407740 | 9.809182  |
| C | -0.009282 | 12.551302 | 9.819379  |
| C | -0.009377 | 15.410358 | 9.828754  |
| C | 1.228849  | 13.266002 | 9.819046  |
| C | 1.228844  | 14.695674 | 9.823566  |
| C | 2.466808  | 12.550863 | 9.811228  |
| C | 2.466538  | 15.410487 | 9.818931  |
| C | 3.704399  | 13.265858 | 9.807362  |
| C | 3.704210  | 14.695414 | 9.810467  |
| C | 4.941779  | 12.550114 | 9.798703  |
| C | 4.941637  | 15.410809 | 9.803895  |
| C | 6.179269  | 13.265745 | 9.797143  |
| C | 6.178944  | 14.695239 | 9.798320  |
| C | 7.416581  | 12.550012 | 9.794354  |
| C | 7.416519  | 15.410701 | 9.796859  |
| C | 8.654108  | 13.265658 | 9.794692  |
| C | 8.654004  | 14.695188 | 9.797176  |
| C | 9.891512  | 12.549924 | 9.793456  |
| C | 9.891524  | 15.410626 | 9.802870  |
| C | 11.128995 | 13.265734 | 9.802972  |
| C | 11.128991 | 14.695366 | 9.808600  |
| C | 12.366638 | 12.550780 | 9.806087  |
| C | 12.366669 | 15.410357 | 9.818116  |
| C | 13.604514 | 13.265862 | 9.816521  |
| C | 13.604438 | 14.695557 | 9.822728  |
| C | 14.842746 | 12.551317 | 9.817697  |
| C | 14.842594 | 15.410130 | 9.828592  |
| C | 16.080876 | 13.266046 | 9.823166  |
| C | 16.080841 | 14.695811 | 9.828185  |
| P | 7.467370  | 6.809852  | 16.765591 |
| W | 5.739370  | 5.810790  | 19.807071 |
| W | 9.207438  | 3.626887  | 16.742430 |
| W | 9.338305  | 7.887301  | 13.865036 |
| W | 5.584488  | 9.909570  | 16.708158 |
| W | 9.223932  | 5.829115  | 19.793065 |
| W | 9.348997  | 9.907172  | 16.706511 |
| W | 5.567707  | 7.873172  | 13.879082 |
| W | 5.718735  | 3.629006  | 16.740495 |
| W | 7.465596  | 4.612471  | 13.890333 |
| W | 3.840699  | 6.890192  | 16.743140 |
| W | 7.468347  | 8.839892  | 19.784209 |
| W | 11.092499 | 6.885218  | 16.703071 |
| O | 7.472216  | 6.818752  | 18.345107 |
| O | 7.466007  | 5.319173  | 16.240736 |

|   |           |           |           |
|---|-----------|-----------|-----------|
| O | 8.753177  | 7.551624  | 16.223641 |
| O | 6.178016  | 7.553146  | 16.233853 |
| O | 4.501042  | 5.095956  | 16.397661 |
| O | 10.438361 | 6.630542  | 18.514932 |
| O | 6.145162  | 6.030327  | 13.670186 |
| O | 8.791454  | 9.479901  | 18.513004 |
| O | 10.429249 | 5.093238  | 16.379487 |
| O | 6.152851  | 9.482550  | 18.517242 |
| O | 8.769441  | 6.035148  | 13.652833 |
| O | 4.514831  | 6.626238  | 18.539187 |
| O | 7.453613  | 8.306442  | 13.633378 |
| O | 5.827572  | 4.345370  | 18.541628 |
| O | 7.465018  | 10.229936 | 16.364760 |
| O | 9.114654  | 4.353266  | 18.534477 |
| O | 8.816002  | 7.605143  | 20.482718 |
| O | 6.119251  | 3.566295  | 14.824120 |
| O | 10.943820 | 8.816052  | 16.964925 |
| O | 3.988933  | 7.251579  | 14.821209 |
| O | 6.139025  | 7.597853  | 20.490293 |
| O | 10.926605 | 7.251294  | 14.788781 |
| O | 3.991561  | 8.818511  | 16.997224 |
| O | 8.807068  | 3.565991  | 14.820598 |
| O | 7.464586  | 2.797161  | 17.012534 |
| O | 5.334536  | 9.572606  | 14.796605 |
| O | 7.482190  | 5.282661  | 20.499114 |
| O | 9.581050  | 9.576839  | 14.786491 |
| O | 4.681513  | 5.204038  | 21.030707 |
| O | 10.268696 | 2.282150  | 16.927686 |
| O | 10.005781 | 8.261883  | 12.304281 |
| O | 4.947464  | 11.501539 | 16.873808 |
| O | 10.290573 | 5.224273  | 21.009440 |
| O | 9.984595  | 11.500314 | 16.865935 |
| O | 4.888527  | 8.239522  | 12.320712 |
| O | 4.655686  | 2.285445  | 16.924279 |
| O | 7.460026  | 3.841997  | 12.331330 |
| O | 2.146425  | 6.641688  | 16.929602 |
| O | 7.469040  | 10.067919 | 20.998575 |
| O | 12.788836 | 6.637179  | 16.865889 |
